# Supplementary material
Source: ML conference proceedings conference paper supplement (https://openreview.net/forum?id=qvGimdNShM)

Intervening on  $\sigma(V_2)$

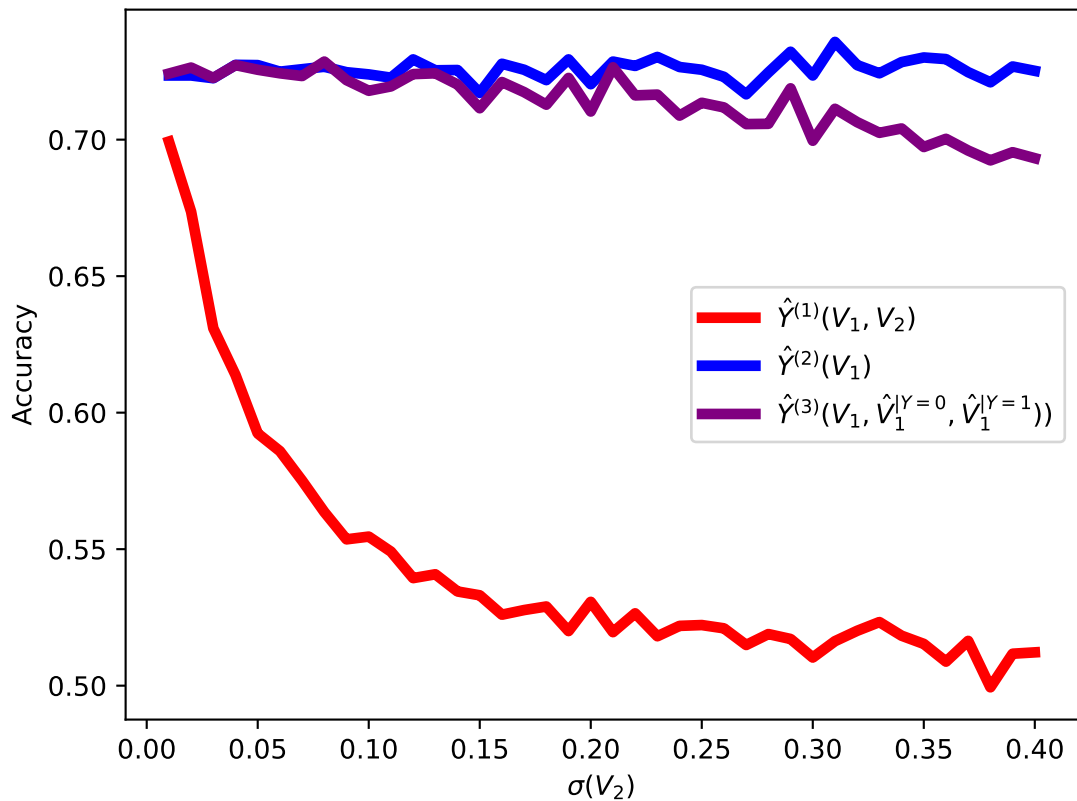

Supplement: supplementary_material [file attachment]

Intervening on  $\mu(U_1)$

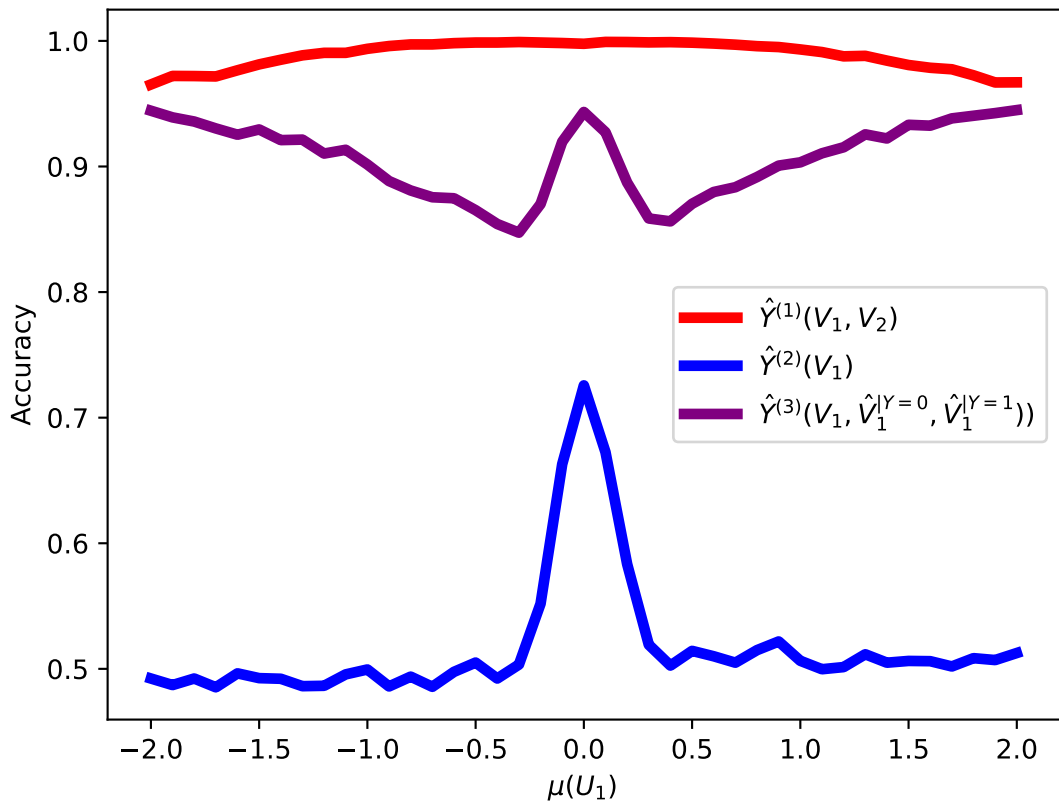

Supplement: supplementary_material [file attachment]

Intervening on  $\mu(U_2)$

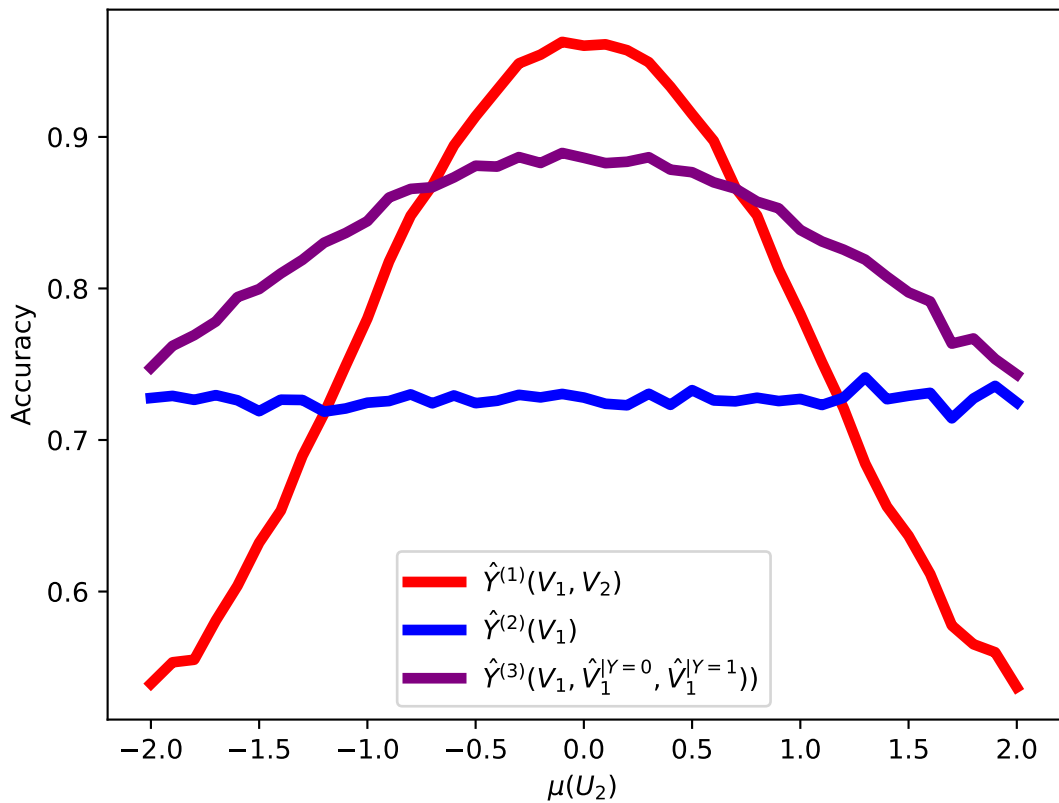

Supplement: supplementary_material [file attachment]

Varying  $\sigma(M_B)$

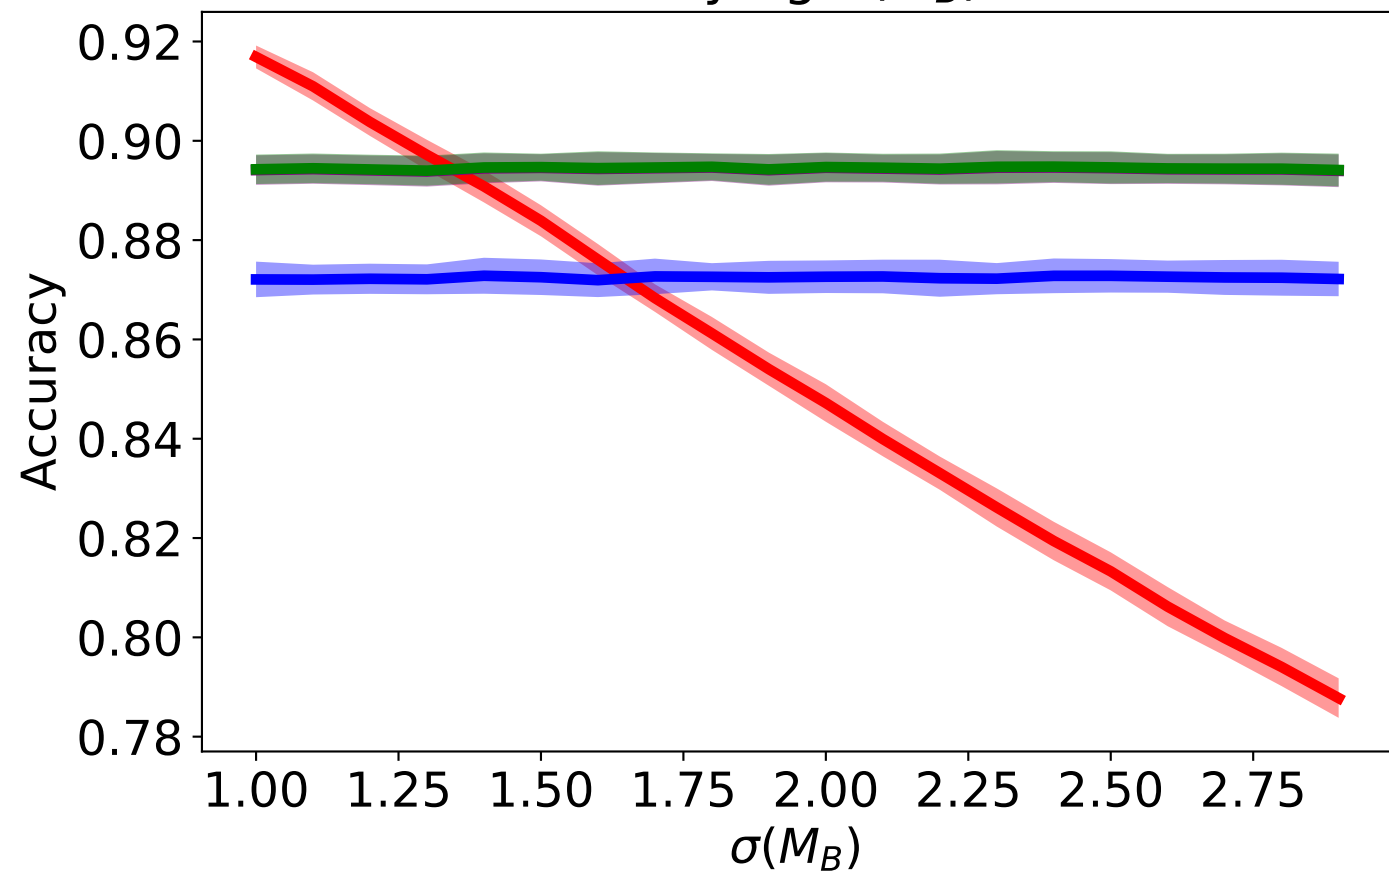

Supplement: supplementary_material [file attachment]

Intervening on  $\sigma(U_1)$

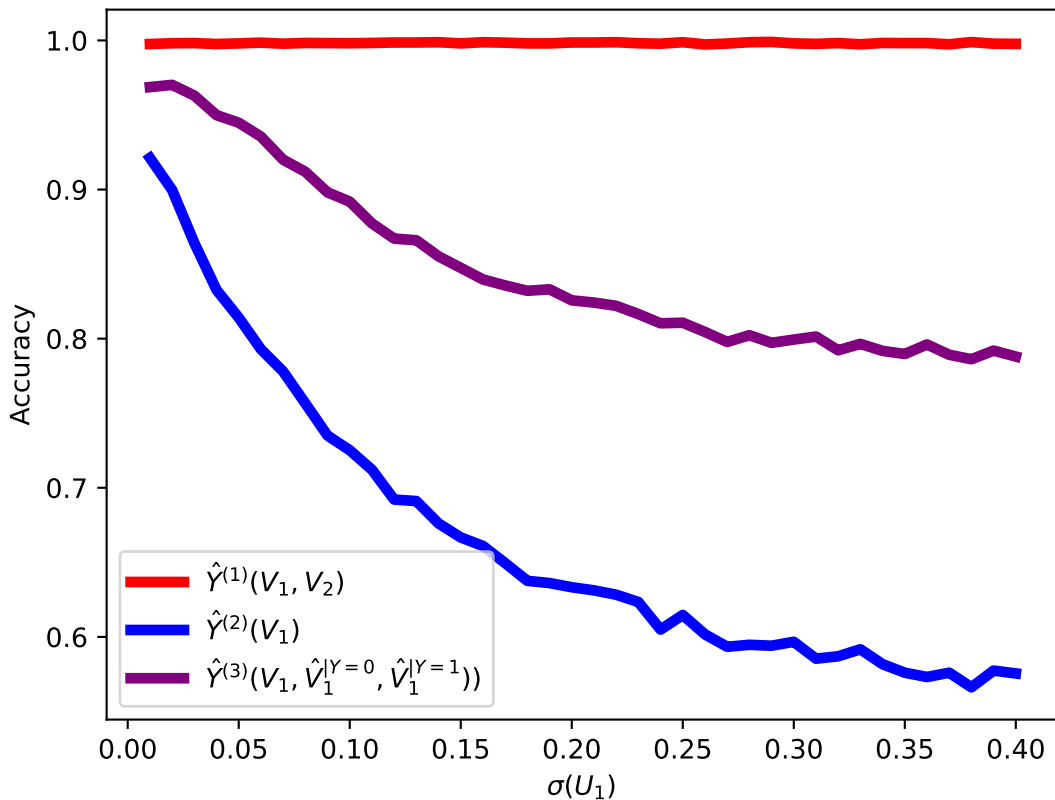

Supplement: supplementary_material [file attachment]

Varying  $\sigma(M_B)$

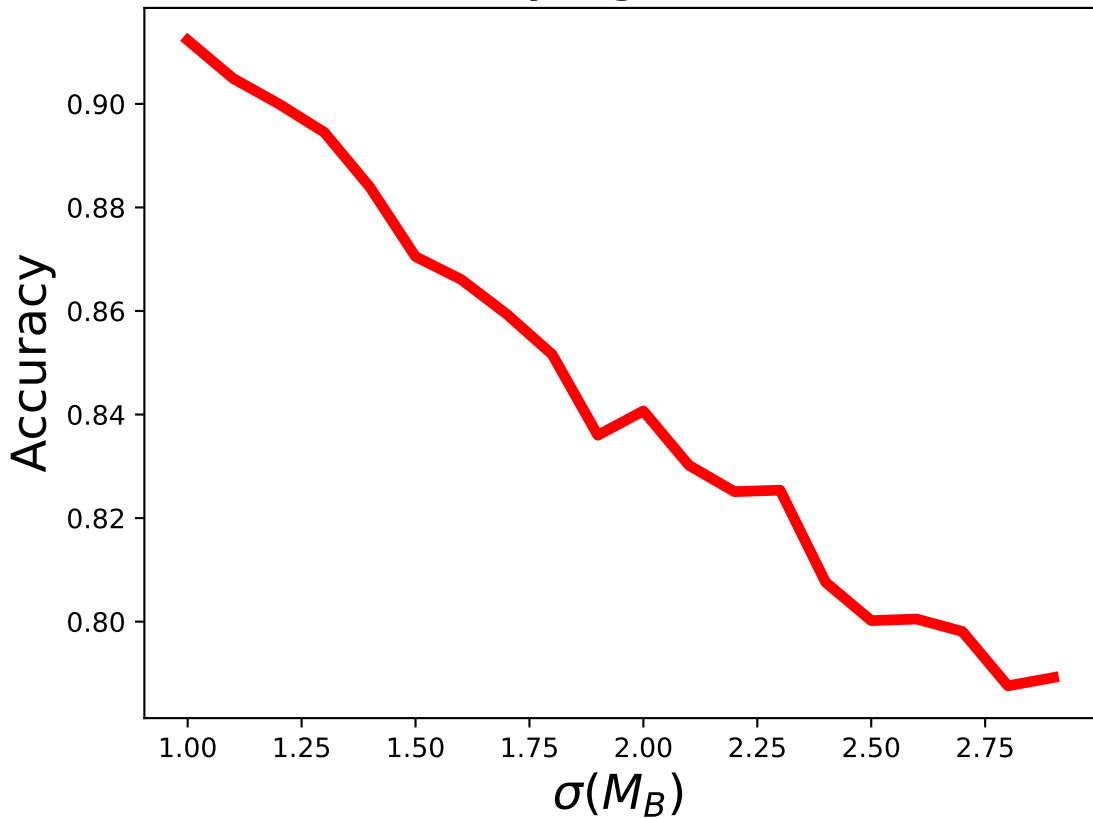

Supplement: supplementary_material [file attachment]

Intervening on  $\sigma(U_2)$

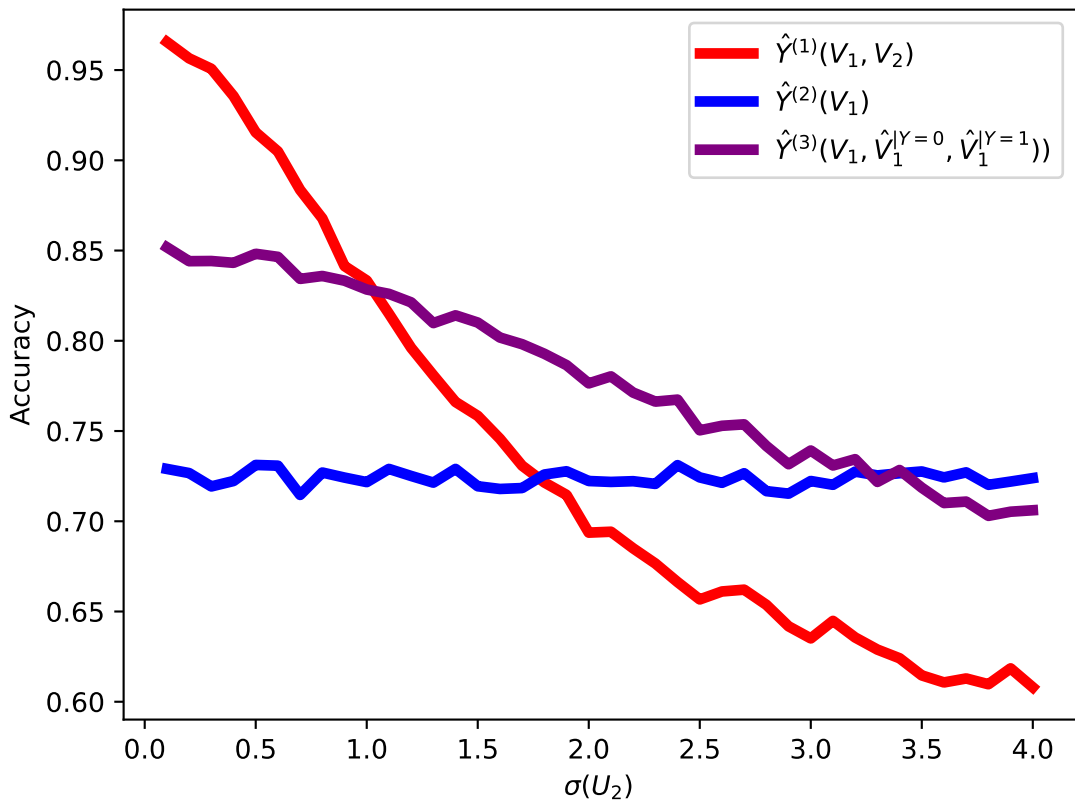

Supplement: supplementary_material [file attachment]

Varying  $\sigma(M_B)$

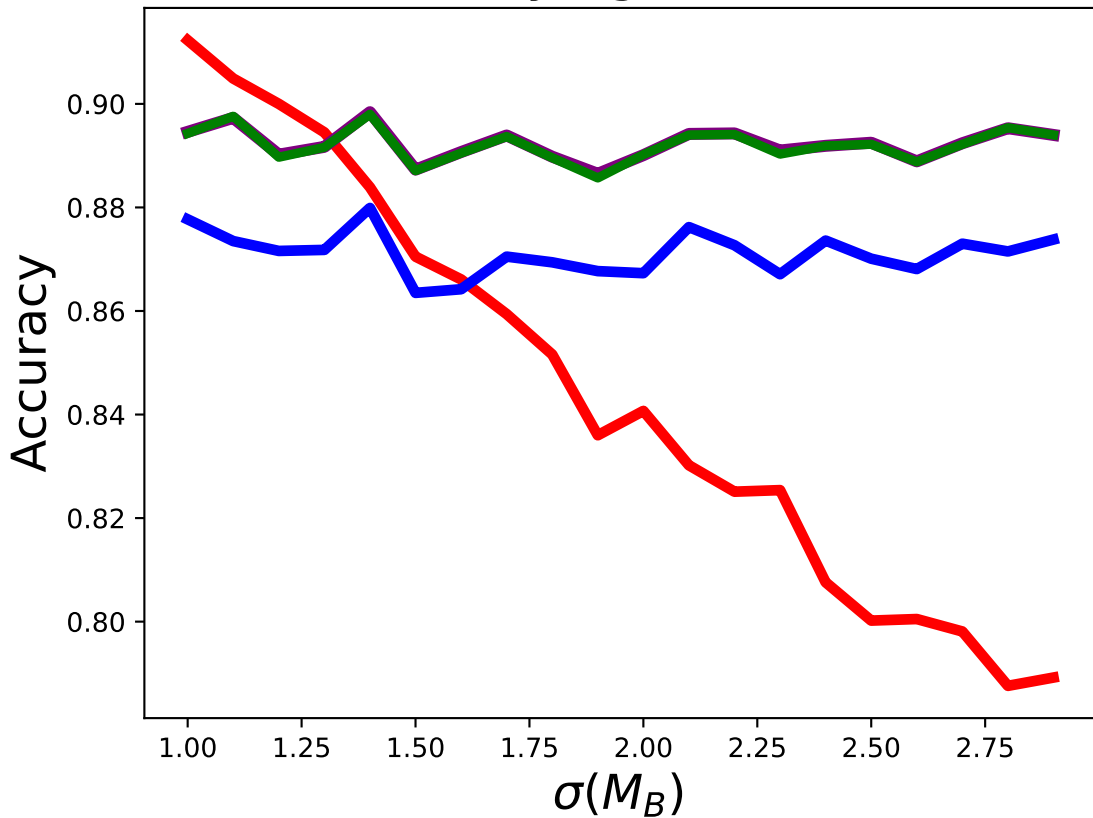

Supplement: supplementary_material [file attachment]

Intervening on  $\mu(V_2)$

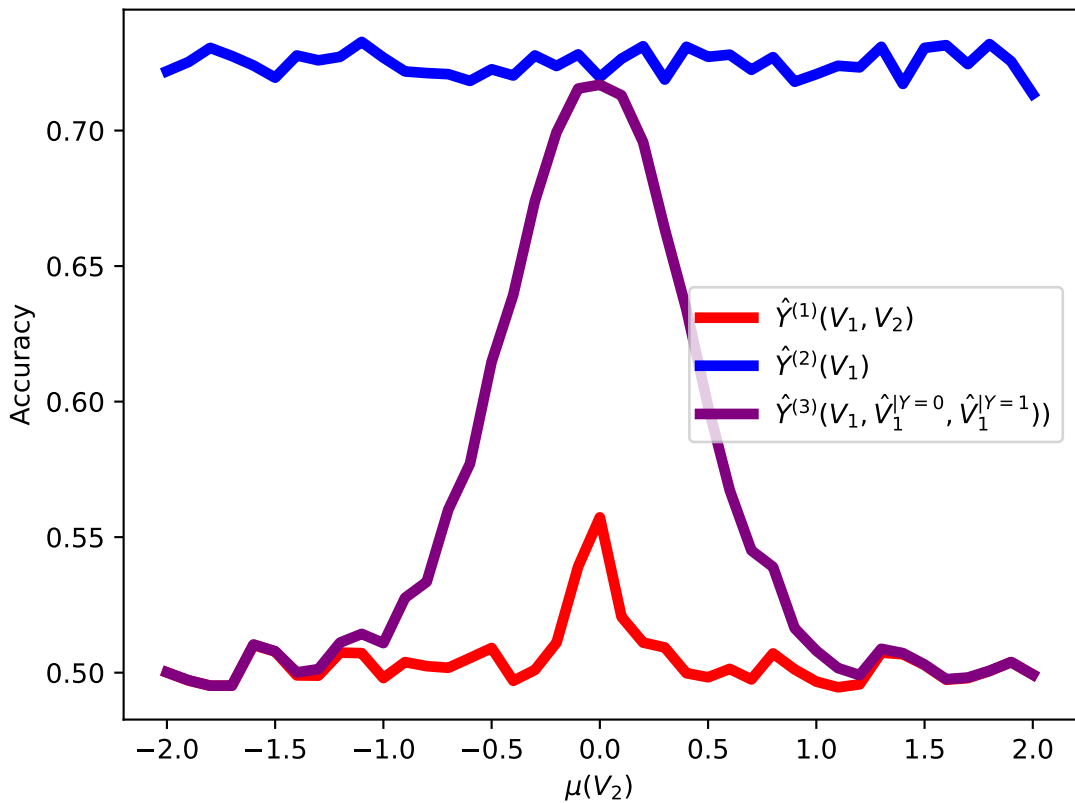

Supplement: supplementary_material [file attachment]

Varying  $\sigma(M_B)$

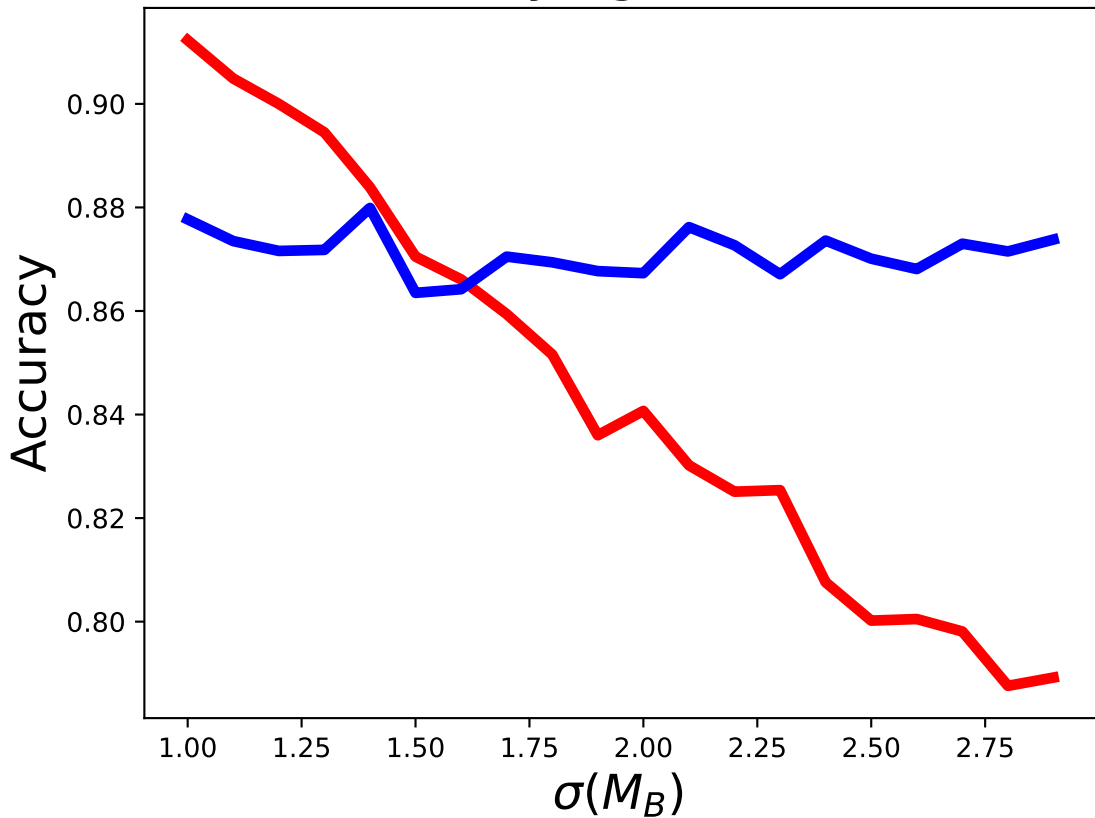

Supplement: supplementary_material [file attachment]

Varying  $\sigma(M_G)$

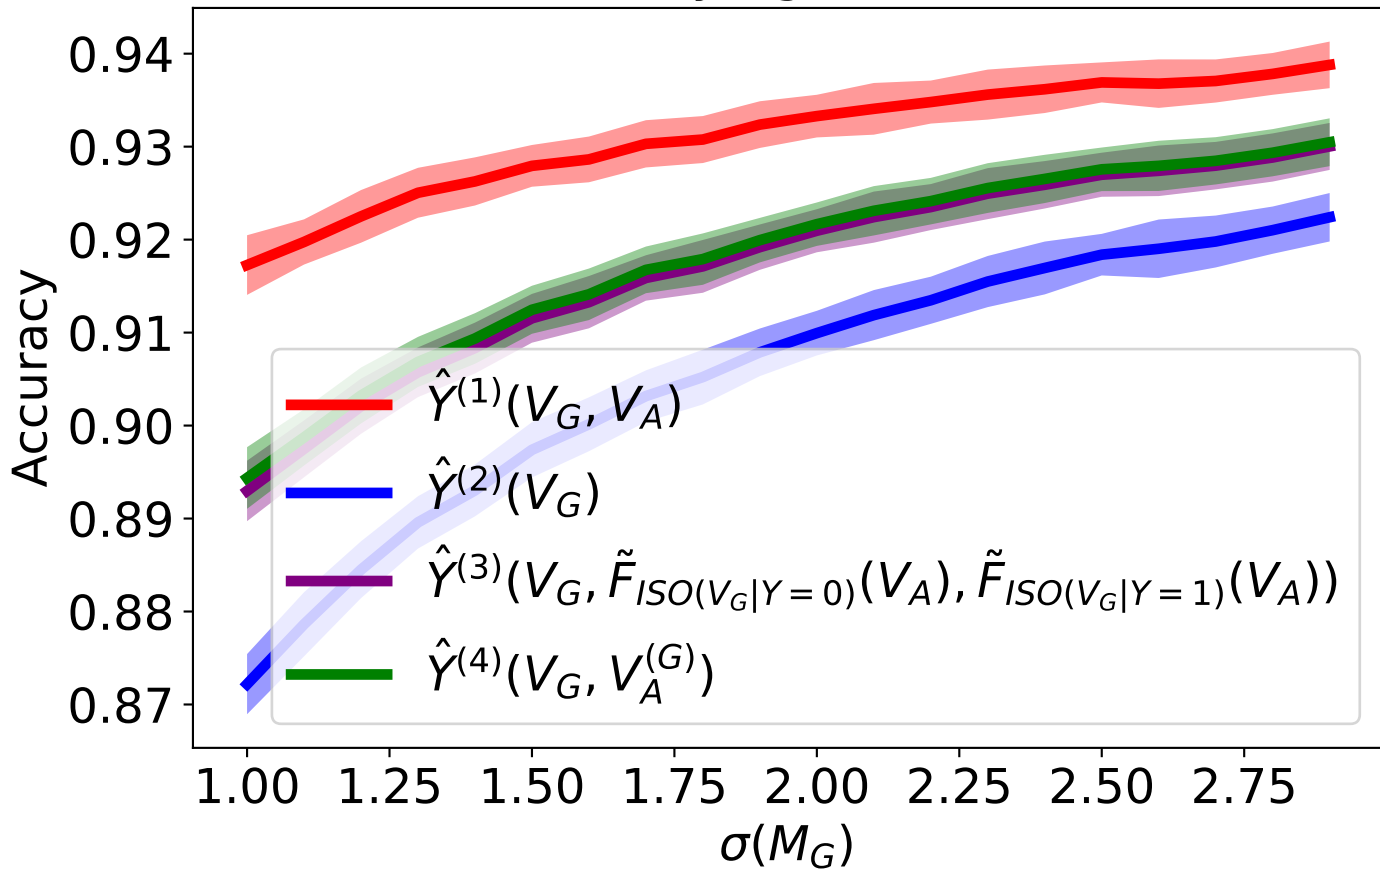

Supplement: supplementary_material [file attachment]

Intervening on  $\mu(V_1)$

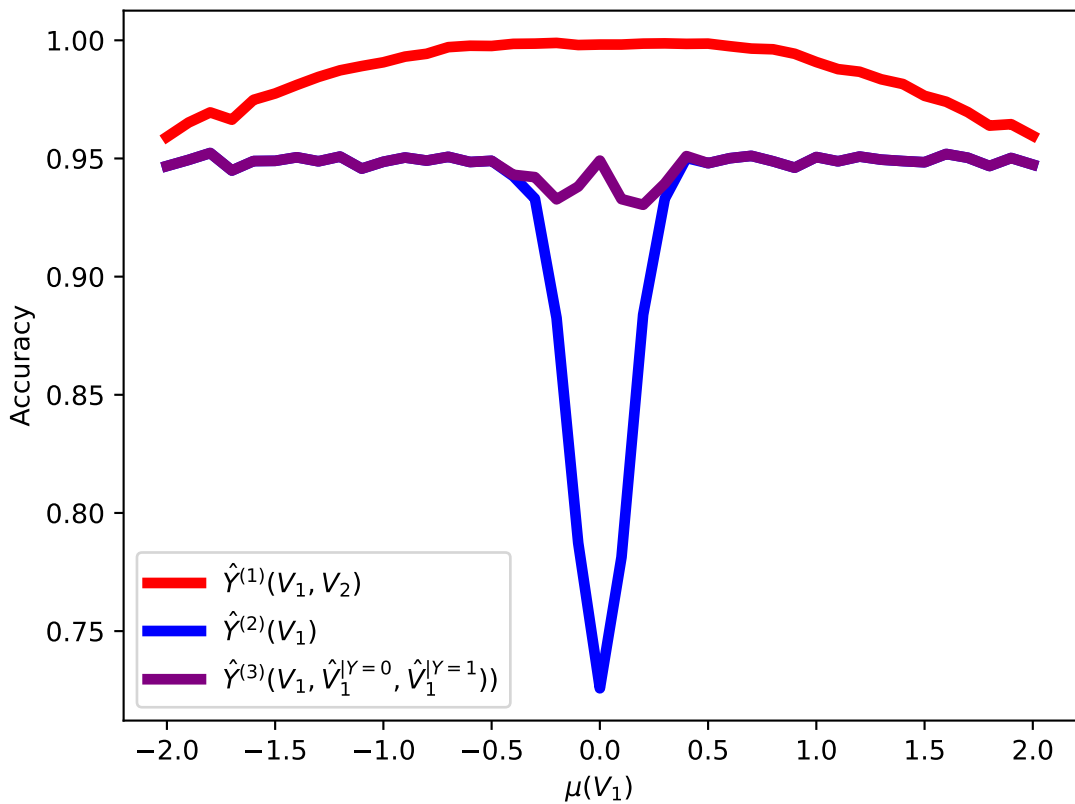

Supplement: supplementary_material [file attachment]

Intervening on  $\sigma(V_1)$

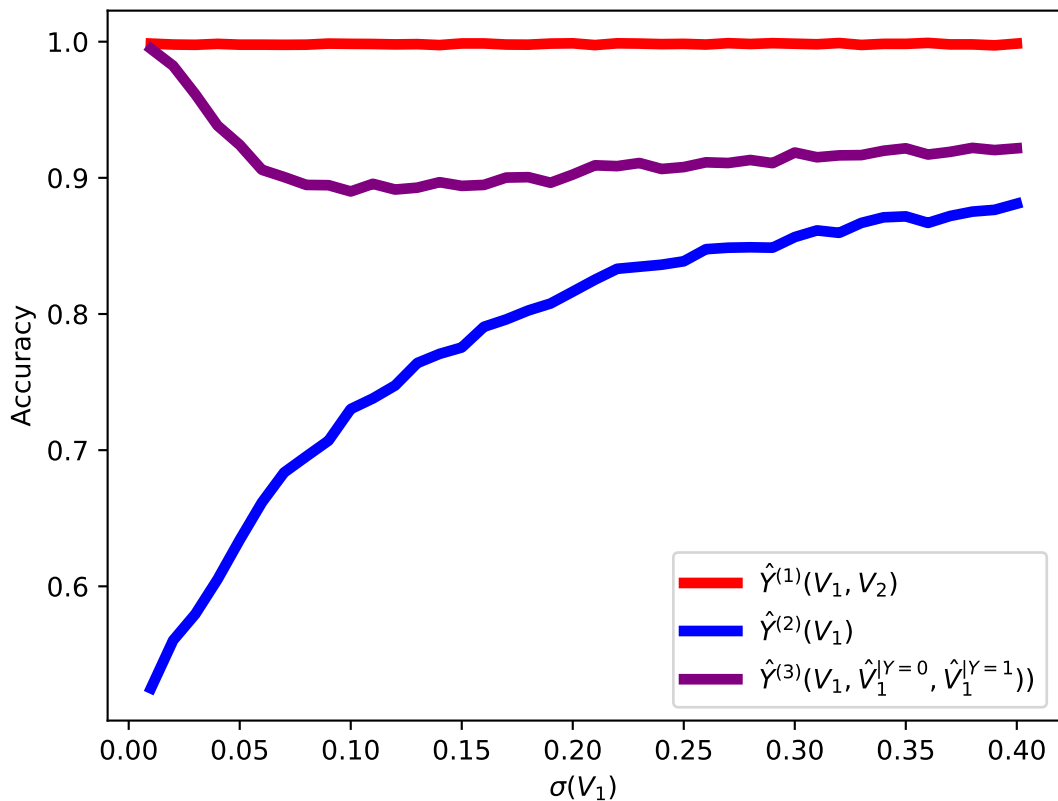

Supplement: supplementary_material [file attachment]

Varying  $\sigma(M_B)$

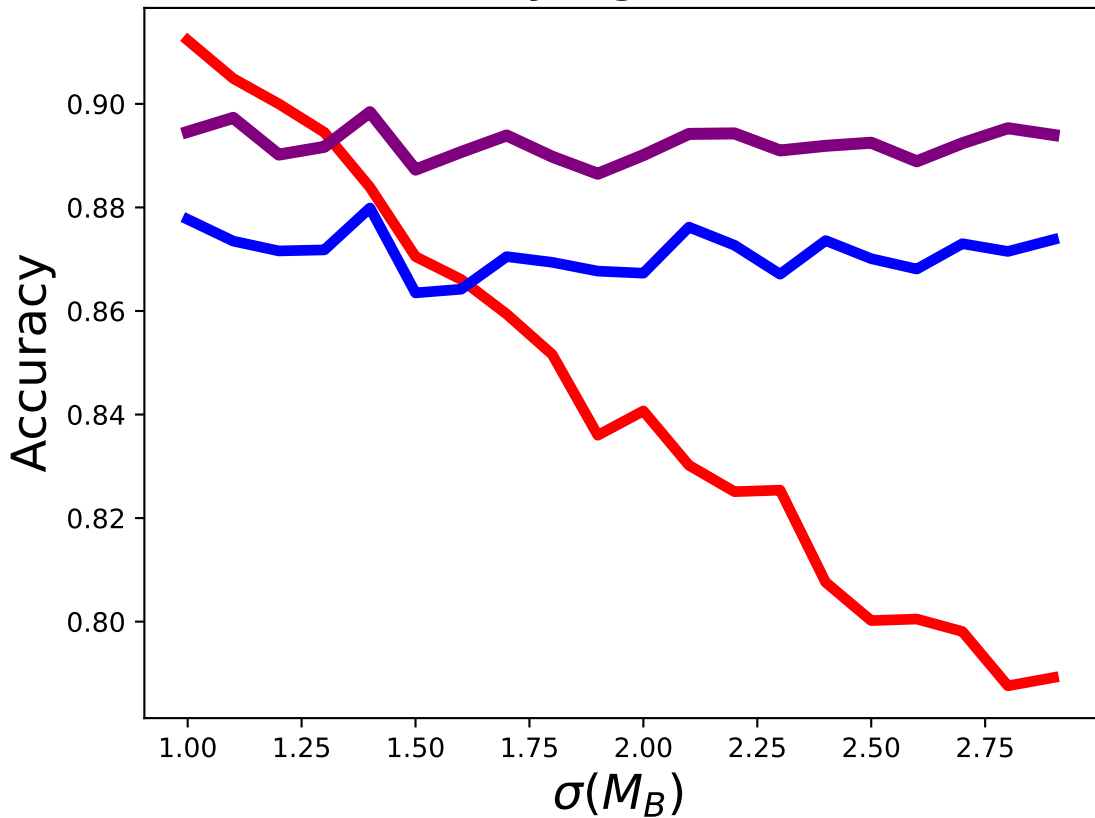

Supplement: supplementary_material [file attachment]

# Varying $\sigma(M_B)$

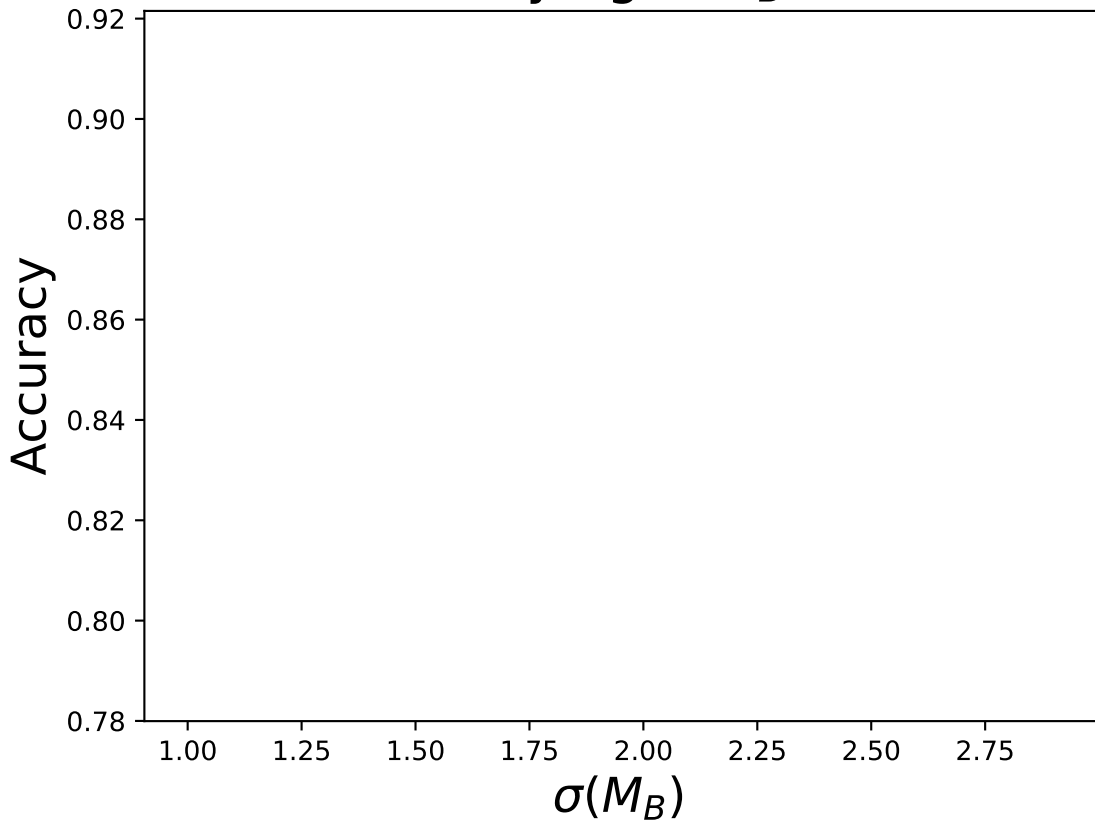

Supplement: supplementary_material [file attachment]
